# Supplementary material
Source: publisher figshare collection journal article supplement (https://gsajournals.figshare.com/ndownloader/files/20973678)
Supplement: Supplementary file 1 [file 20973678]

## Sheet: Table S8
Table S8	OrthoFinder Summary
Property	Value
Number of genes	349442
Number of genes in orthogroups	302123
Number of unassigned genes	47319
Percentage of genes in orthogroups	86.5
Percentage of unassigned genes	13.5
Number of orthogroups	15064
Number of species-specific orthogroups	670
Number of genes in species-specific orthogroups	2967
Percentage of genes in species-specific orthogroups	0.8
Mean orthogroup size	20.1
Median orthogroup size	18
G50 (assigned genes)	26
G50 (all genes)	23
O50 (assigned genes)	3476
O50 (all genes)	4439
Number of orthogroups with all species present	2915
Number of single-copy orthogroups	39
